# Supplementary material
Source: PubMed Central journal article supplement (PMC2275029)
Supplement: blood_blood-2007-09-114454_1.pdf [file blood_blood-2007-09-114454_1.pdf]

| Sample #           | Blood/<br>Marrow | Pt Name  | Date     | Dana # | Diagnosis                              | WBC  | Blast Count | HCT  | PCT | BM Blast | Chrom                       | Notes                                              | FLT3  |
|--------------------|------------------|----------|----------|--------|----------------------------------------|------|-------------|------|-----|----------|-----------------------------|----------------------------------------------------|-------|
| CM 25083<br>(AML1) | BM               | RC – 72M | 04-30-04 | 306426 | M2 AML -<br>relapse                    | 96.5 | 84%         | 26.1 | 51  | 74       | t(13:17)                    | relapse #1, 6mo DFI                                | ITD + |
| CM 24152<br>(AML2) | BM               | TS – 75F | 03-04-04 | 294161 | M4 AML –<br>2 <sup>0</sup> new         | 22.3 | 16%         | 34.9 | 21  | 44       | t(3:5)                      | new dx:<br>2 <sup>0</sup> AML                      | ITD + |
| CM 27603<br>(AML4) | BM               | DM – 49F | 09-29-04 | 150085 | M4 AML –<br>relapse                    | 9.0  | 75%         | 30.9 | 60  | 93       | t(4;21), inv 9,<br>t(15:22) | relapse #4: s/p 3 allo<br>tx 3months FTI           | ITD + |
| CM 23117<br>(AML5) | BM               | VC – 68M | 01-05-01 | 296110 | M1 AML –<br>new                        | 4.9  | 20%         | 26.3 | 143 | 60       | NL                          | new dx:<br>no rx                                   | no    |
| CM 16686<br>(CML1) | BM               | MP – 85M | 10-16-02 | 274926 | CML –<br>Biophenotypic<br>blast crisis | 29.3 | 2%          | 30.8 | 185 | 37       | t(9:22)                     | new dx:<br>no rx                                   | n/a   |
| CM 16893<br>(CML2) | BM               | PZ – 67M | 10-31-02 | 212444 | CML – LBC                              | 1.5  | 43%         | 32.6 | 219 | 97       | NL                          | progressed s/p<br>hydraea, imatinib,<br>FTI, chemo | n/a   |
| n/a<br>(AML3)      | PB               | RL – 51M | 08-07-07 | 386714 | M2 AML                                 | 2.2  | 14%         | 37.9 | 202 | 55       | n/a                         | new dx - untreated                                 | ITD+  |
| n/a<br>(AML6)      | BM               | EG – 70M | 08-06-07 | 386215 | AML                                    | 2.0  | 5%          | 29.3 | 19  | 54       | n/a                         | new dx – 1 <sup>0</sup> –<br>untreated             | no    |
| n/a<br>(AML7)      | BM               | DS – 40F | 08-03-07 | 386531 | M1 AML                                 | 68.6 | 68%         | 30.6 | 60  | 90       | 9q-                         | new dx – 1 <sup>0</sup> –<br>untreated             | ITD+  |
